# Supplementary material for: Fine-tuning of ZIF-67 pore sizes via ligand exchange: optimal active site interactions for iodine capture
Source: Royal Society of Chemistry journal article supplement (doi:10.1039/d5nj03807c), 2025-12-03
Supplement: d5nj03807c1.pdf [file d5nj03807c1.pdf]

## Supporting Information

### **Fine-tuning of ZIF-67 Pore Sizes via Ligand Exchange: Optimal Active Site Interactions for Iodine Capture**

*Le Chen,<sup>a</sup> Jianjun Yin,<sup>a</sup> Lin Nie,<sup>a</sup> Junyan Qian,<sup>a</sup> An Xie,<sup>a</sup> Pengxiang Qiu,<sup>b,\*</sup> Junfeng Qian,<sup>a,\*</sup> Qun Chen<sup>a</sup> and Zhihui Zhang<sup>a,\*</sup>*

<sup>a</sup> Jiangsu Key Laboratory of Advanced Catalytic Materials and Technology, Advanced Catalysis and Green Manufacturing Collaborative Innovation Center, Changzhou University, Changzhou, 213164, China. E-mail: zhangzh@cczu.edu.cn (Z. Z.) and qianjunfeng@cczu.edu.cn (J. Q.)

<sup>b</sup> Jiangsu Key Laboratory of Atmospheric Environment Monitoring and Pollution Control (AEMPC), Collaborative Innovation Center of Atmospheric Environment and Equipment Technology (CIC-AEET), Nanjing University of Information Science & Technology, Nanjing 210044, China. E-mail: pxqiu@nuist.edu.cn (P. Q.)

\*Corresponding authors' e-mails: pxqiu@nuist.edu.cn (P. Q.); zhangzh@cczu.edu.cn (Z. Z.); qianjunfeng@cczu.edu.cn (J. Q.)

## 1. Experimental sections

### 1.1 Characterization

Powder X-ray diffraction (PXRD) patterns were collected at room temperature in a Rigaku D/MAX-2500PC diffractometer (Rigaku Co., Japan) using Cu K $\alpha_1$  radiation ( $\lambda$  = 0.15406 nm) operated at 40 kV and 100 mA. Field emission scanning electron microscopy (FE-SEM) images were taken at 5 kV with a SUPRA-55 microscope. Transmission electron microscopy (TEM) images were taken with a JEOL 2100 microscope. Thermogravimetric analysis (TGA) (SDTQ600) of the activated powder was performed from room temperature to 800 °C with a scan rate of 10 °C/min under a Nitrogen atmosphere. N<sub>2</sub> adsorption and desorption isotherms were measured at 77 K using a Micromeritics ASAP 2460 sorption analyzer. The Brunauer-Emmett-Teller (BET) method was utilized to calculate the specific surface areas using adsorption data in a relative pressure range from 0.05 to 0.30. The pore size distributions and pore volume were derived from the desorption branches of the isotherms. X-ray photoelectron spectroscopy (XPS) analysis was conducted on a PHI 5000 VersaProbe II spectrometer equipped with an Al K $\alpha$  X-ray source operating at 12 kV and 6 mA. UV-Vis absorption spectra were collected using a UV-Vis spectrophotometer (SPECORD® 210 PLUS) in the wavelength range from 200 to 700 nm.

**Table S1** Pore structure parameters of ZIF-67 and ZIF-67-IM materials

| Sample    | BET surface area (m <sup>2</sup> /g) | Total pore volume<br>(cm <sup>3</sup> /g) | Average pore diameter (nm) |
|-----------|--------------------------------------|-------------------------------------------|----------------------------|
| ZIF-67    | 1327                                 | 0.74                                      | 2.24                       |
| ZIF-67-IM | 1590                                 | 0.93                                      | 2.33                       |

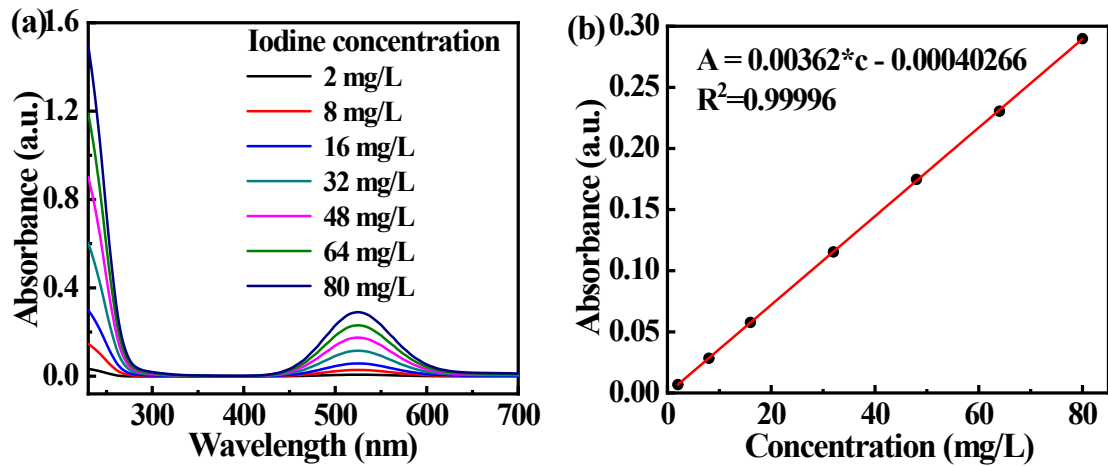

**Fig. S1** (a) Absorption curves of standard iodine/cyclohexane solutions; (b) Absorbance/concentration standard curve.

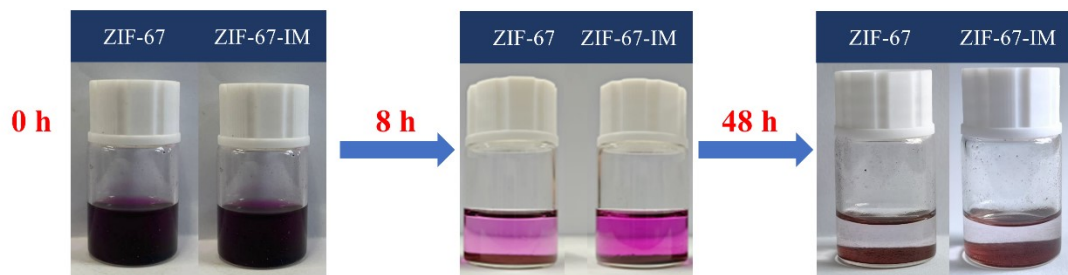

**Fig. S2** The color change of solution during the adsorption of iodine by ZIF-67 and ZIF-67-IM (after 48 h of adsorption).

## 2. I<sub>2</sub> adsorption studies

### 2.1 Adsorption kinetics

The quantitative basis of Spectrophotometry-Lambert-Beer law:

$$A = \lg \frac{I_0}{I} = abc \quad (\text{S1})$$

The calculation formulas for the removal rate of iodine molecules and the adsorption capacity of the adsorbent during the adsorption process are as follows:

$$\text{Removal efficiency}(\%) = \frac{C_0 - C_t}{C_0} \times 100\% \quad (\text{S2})$$

$$q_t = \frac{V(C_0 - C_t)}{m} \quad (S3)$$

The pseudo-first-order model is:

$$\frac{dq_t}{dt} = k_1 (q_e - q_t) \quad (S4)$$

The linear expression of the pseudo-first-order kinetic equation obtained by integration is as follows:

$$\log(q_e - q_t) = \log q_e - \frac{k_1}{2.303} t \quad (S5)$$

The pseudo-second-order model is:

$$\frac{dq_t}{dt} = k_2 (q_e - q_t)^2 \quad (S6)$$

The linear expression of the pseudo-second-order dynamic equation obtained by integration is as follows:

$$\frac{t}{q_t} = \frac{1}{k_2 q_e^2} + \frac{t}{q_e} \quad (S7)$$

## 2.2 Adsorption equilibrium

The Langmuir model assumes that a uniform surface is formed by monolayer adsorption, and the equation is as follows:

$$q_e = \frac{q_{\max} k_L C_e}{1 + k_L C_e} \quad (S8)$$

The linear Langmuir model is expressed as the following equation:

$$\frac{C_e}{q_e} = \frac{1}{k_L q_{\max}} + \frac{C_e}{q_{\max}} \quad (S9)$$

The Freundlich equation is based on the assumption of non-uniform adsorption on the adsorbent surface, and the expression is as follows:

$$q_e = k_F C_e^{1/n_F} \quad (\text{S10})$$

The Freundlich model is expressed as the following equation:

$$\ln q_e = \ln k_F + \frac{1}{n_F} \ln C_e \quad (\text{S11})$$

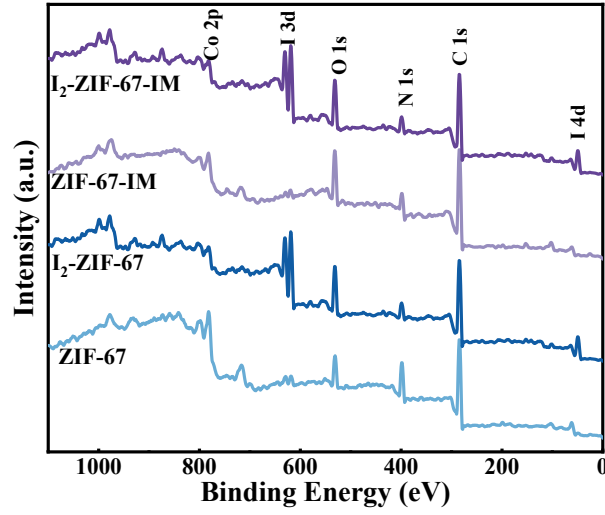

**Fig. S3** XPS survey spectra of ZIF-67 and ZIF-67-IM before and after adsorption of I<sub>2</sub>

**Table S2** The pseudo-first-order kinetic and pseudo-second-order kinetic model parameters of the iodine adsorption process of ZIF-67 and ZIF-67-IM materials.

| Sample    | Pseudo-first-order model |                             |       | Pseudo-second-order model                    |                             |       |
|-----------|--------------------------|-----------------------------|-------|----------------------------------------------|-----------------------------|-------|
|           | $k_1$ (h <sup>-1</sup> ) | $q_e$ (mg·g <sup>-1</sup> ) | $R^2$ | $k_2$ (g·mg <sup>-1</sup> ·h <sup>-1</sup> ) | $q_e$ (mg·g <sup>-1</sup> ) | $R^2$ |
| ZIF-67    | 0.157                    | 562.5                       | 0.962 | 0.001                                        | 900.9                       | 0.999 |
| ZIF-67-IM | 0.136                    | 541.3                       | 0.931 | 0.001                                        | 885.0                       | 0.999 |

**Table S3** Langmuir and Freundlich model parameters of ZIF-67 and ZIF-67-IM iodine adsorption isotherms.

| Sample    | Langmuir model              |                                  |       | Freundlich model                                            |       |       |
|-----------|-----------------------------|----------------------------------|-------|-------------------------------------------------------------|-------|-------|
|           | $k_L$ (L·mg <sup>-1</sup> ) | $q_{\max}$ (mg·g <sup>-1</sup> ) | $R^2$ | $k_F$ (mg <sup>1-n</sup> ·L <sup>n</sup> ·g <sup>-1</sup> ) | $n_F$ | $R^2$ |
| ZIF-67    | 0.020                       | 2618.2                           | 0.958 | 371.194                                                     | 3.369 | 0.916 |
| ZIF-67-IM | 0.018                       | 2560.9                           | 0.958 | 326.618                                                     | 3.224 | 0.938 |
